# Supplementary material for: Formation of Au nanoflowers on cysteamine monolayer and their electrocatalytic oxidation of nitrite
Source: Royal Society of Chemistry journal article supplement (doi:10.1039/c1ay05062a), 2011-01-01
Supplement: c1ay05062a.pdf [file c1ay05062a.pdf]

## Supporting Information

### Formation of Au Nanoflowers on Cysteamine Monolayer and Their Electrocatalytic Oxidation of Nitrite

Yongxin Li\*, Shengnan Wu, Yuanli Chen, Qiufang Lu, Lun Wang

<sup>a</sup> College of Chemistry and Materials Science, Anhui Normal University, Wuhu, 241000 China

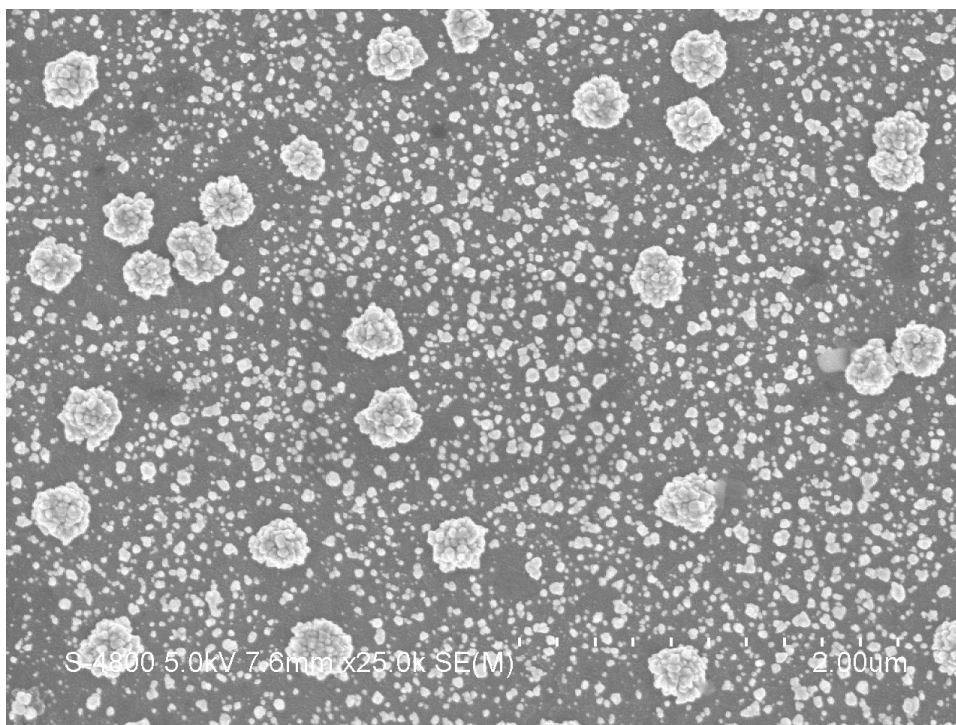

**Figure S1** FE-SEM image of Au nanoflowers modified on the Cys/Au electrode surface.
